# Supplementary figures and images for: Phenolic Compounds in Extracts of Hibiscus acetosella (Cranberry Hibiscus) and Their Antioxidant and Antibacterial Properties
Source: MDPI journal article supplement (doi:10.3390/molecules25184190), 2020-09-12

Fig. S2

*Staphylococcus aureus*

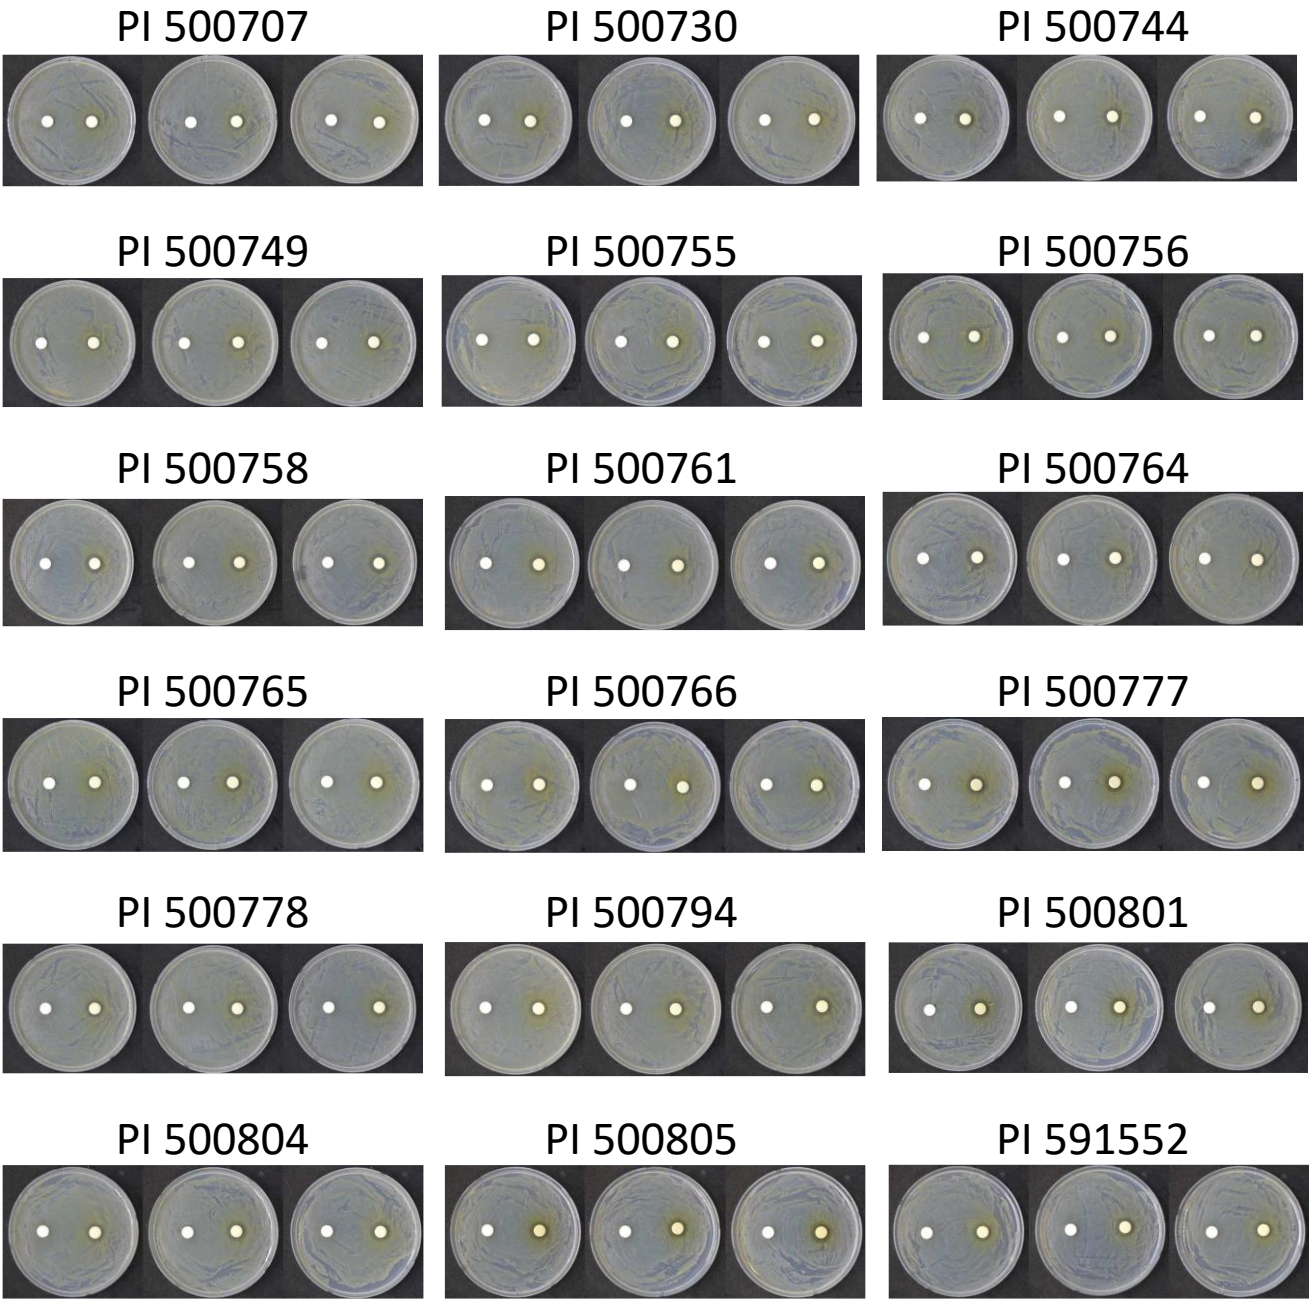

Fig. S2 continued

*Pseudomonas aeruginosa*

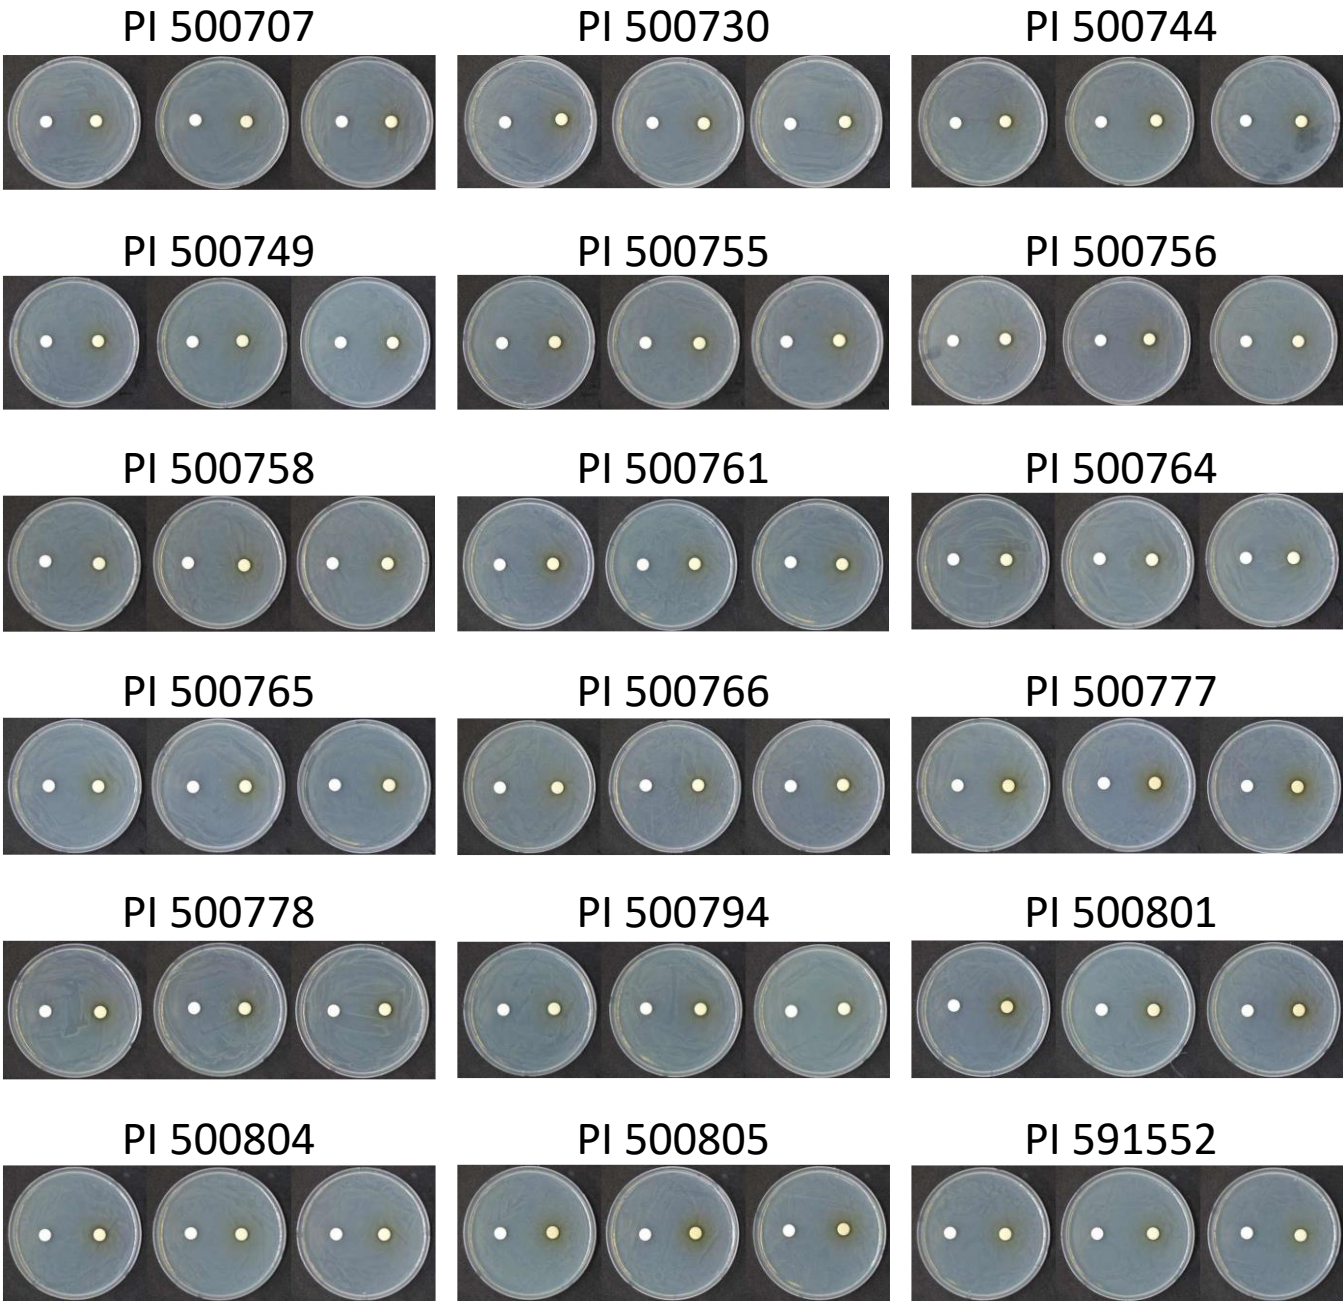

Supplement: s1 [file s1]

Fig. S1.

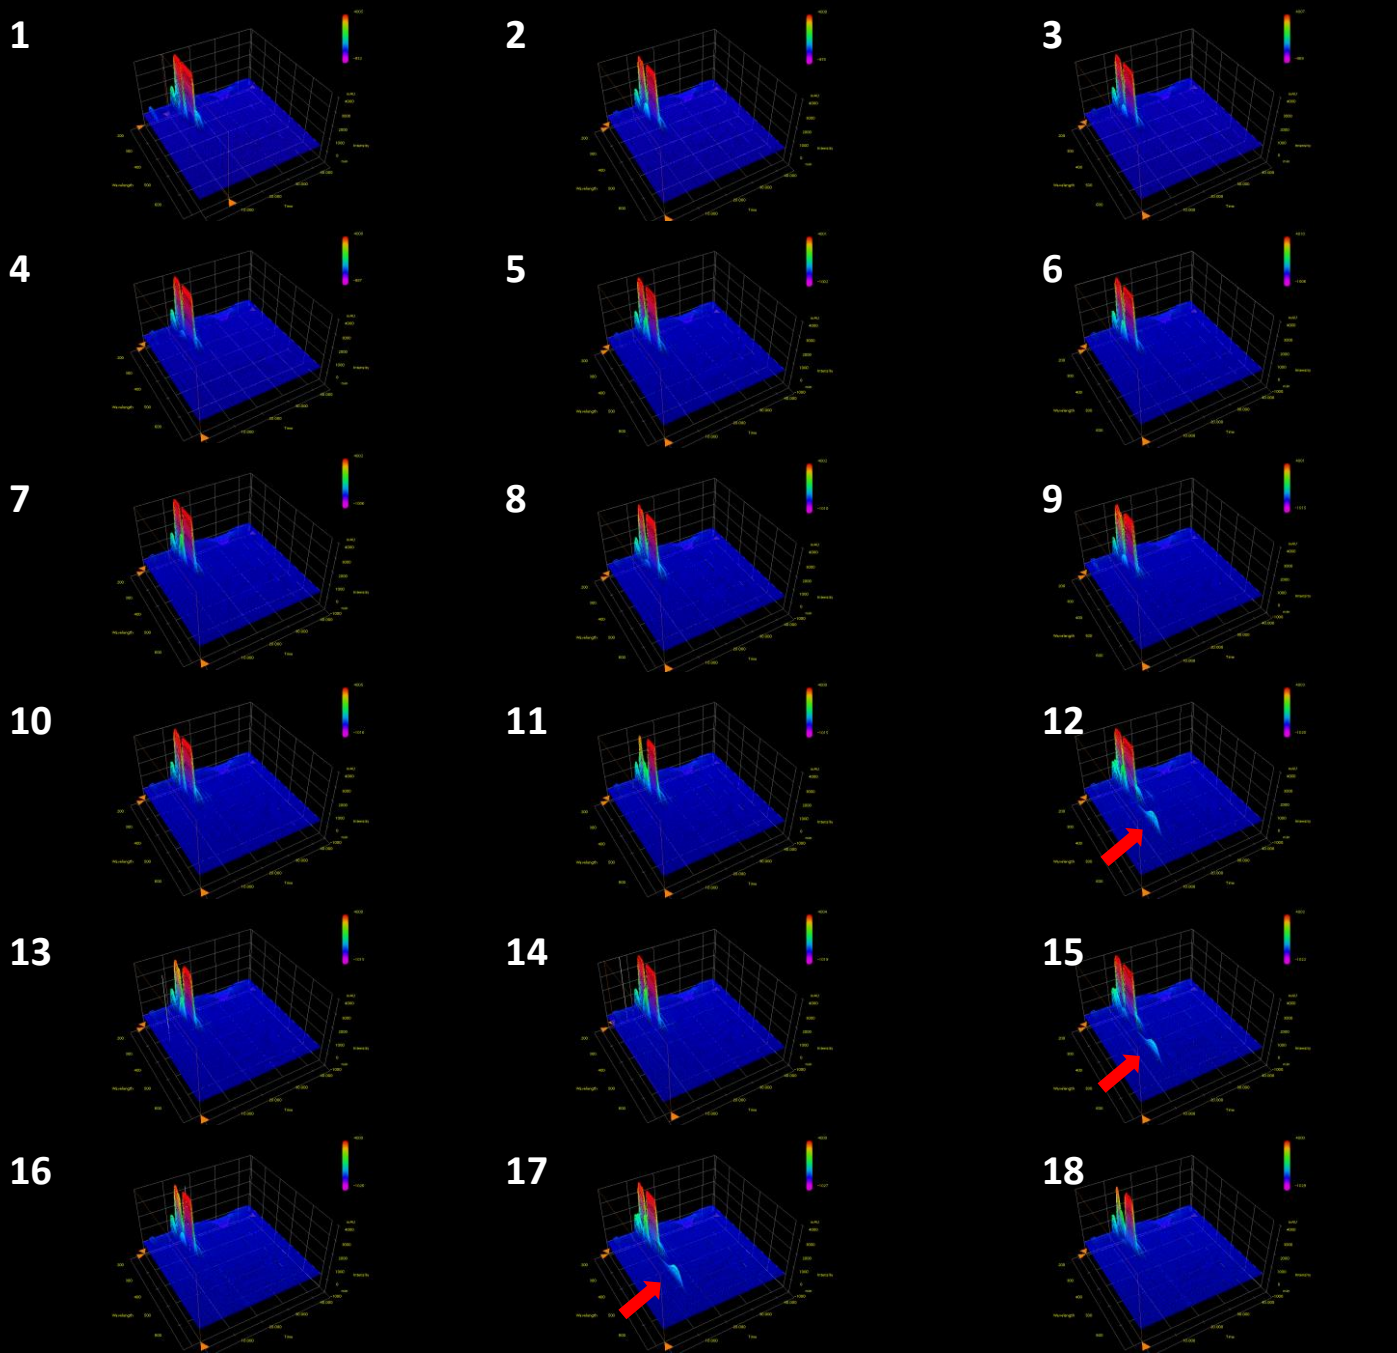

Supplement: s1 [file s1]
